# Supplementary material for: Efficient planar perovskite solar cells using room-temperature vacuum-processed C60 electron selective layers
Source: Royal Society of Chemistry journal article supplement (doi:10.1039/c5ta04313a), 2015-01-01
Supplement: c5ta04313a1.pdf [file c5ta04313a1.pdf]

## Electronic supplementary information

### **Efficient planar perovskite solar cells using room-temperature vacuum-processed C<sub>60</sub> electron selective layers**

Weijun Ke,<sup>‡ab</sup> Dewei Zhao,<sup>‡b</sup> Corey R. Grice,<sup>b</sup> Alexander J. Cimaroli,<sup>b</sup> Jie Ge,<sup>b</sup> Hong Tao,<sup>a</sup> Hongwei Lei,<sup>a</sup> Guojia Fang<sup>\*a</sup> and Yanfa Yan<sup>\*b</sup>

<sup>a</sup> Key Laboratory of Artificial Micro- and Nano-structures of Ministry of Education of China, School of Physics and Technology, Wuhan University, Wuhan 430072, China. E-mail: gjfang@whu.edu.cn

<sup>b</sup> Department of Physics and Astronomy and Wright Center for Photovoltaics Innovation and Commercialization, The University of Toledo, Toledo, OH 43606, USA. E-mail: yanfa.yan@utoledo.edu

<sup>‡</sup>These authors contributed to this work equally.

## Experimental Section

### Device Fabrication:

The Vacuum-processed  $C_{60}$  (Luminescence Technology Co., Ltd, >99.5%) electron selective layers were deposited on FTO coated soda-lime glass substrates by thermal evaporation at a rate of 0.02 nm/s. The different thicknesses of the  $C_{60}$  films were controlled by the deposition time. The solution-processed  $C_{60}$  electron selective layers were prepared by spin-coating method, according to the literature reports.<sup>1</sup> 460 mg/mL  $PbI_2$  (Sigma, 99.999%) dissolved in DMF was stirred at 60 °C for 24h. Perovskite  $CH_3NH_3PbI_3$  films were prepared by a typical two-step dip-coating method.<sup>2</sup> FTO substrates were heated on a hotplate at 60 °C for 30min. The hot  $PbI_2$  solution was quickly applied drop-wise and spin-coated on the FTO substrates without and with the  $C_{60}$  interface layers at 500 rpm for 1s and then 3000 rpm for 30 s. The substrates covered with the  $PbI_2$  films were annealed at 100 °C for 10 min. The dried  $PbI_2$  films were dipped into a solution of 200 mg  $CH_3NH_3I$  dissolved in 20 ml 2-propanol at 55 °C for 5 min and then were quickly rinsed with clean 2-propanol. The films were finally annealed at 100 °C for 10 min. The finished perovskite films were spin-coated with a solution of electron blocking material at 500 rpm for 1s and then 6000 rpm for 60 s. The electron blocking material consisted of 26 mM Li-TFSI (Sigma, 99.95%), 55 mM TBP (Sigma, 96%), and 68 mM spiro-OMeTAD (Shenzhen Feiming Science and Technology Co., Ltd., 99.0%) dissolved in a mixed solvent of chlorobenzene and acetonitrile with a volume ratio of 10:1. The devices were finally completed by evaporating 60 nm Au electrodes. The active areas of the cells defined by the Au

electrodes were 0.08 cm<sup>2</sup>.

#### Film and Device Characterization:

The crystal structure of the prepared CH<sub>3</sub>NH<sub>3</sub>PbI<sub>3</sub> film on the FTO substrates covered with a C<sub>60</sub> interface layer was examined by XRD (Rigaku Ultima III) with Cu K $\alpha$  radiation under operation conditions of 40 kV and 44 mA. Absorption spectrum of the perovskite CH<sub>3</sub>NH<sub>3</sub>PbI<sub>3</sub> film on the substrate covered with a C<sub>60</sub> interface layer and transmission spectra of the substrates without and with a C<sub>60</sub> interface layers in different thicknesses were measured by an ultraviolet–visible spectrophotometer (CARY5000, Varian, Australia). AFM images of the substrates without and with a C<sub>60</sub> interface layer were characterized by a Veeco Nanoscope IIIA instrument. The morphologies of the device and the perovskite film were characterized by a high-resolution field emission SEM (Hitachi S-4800).  $V_{oc}$  decay curves and QE spectra were performed on an electrochemical workstation (Solartron Modulab) and a QE system (PV Measurements Inc.), respectively. All the  $J$ - $V$  curves were measured by a Keithley Model 2400 under AM1.5 simulated irradiation with a standard solar simulator (PV Measurements Inc.).

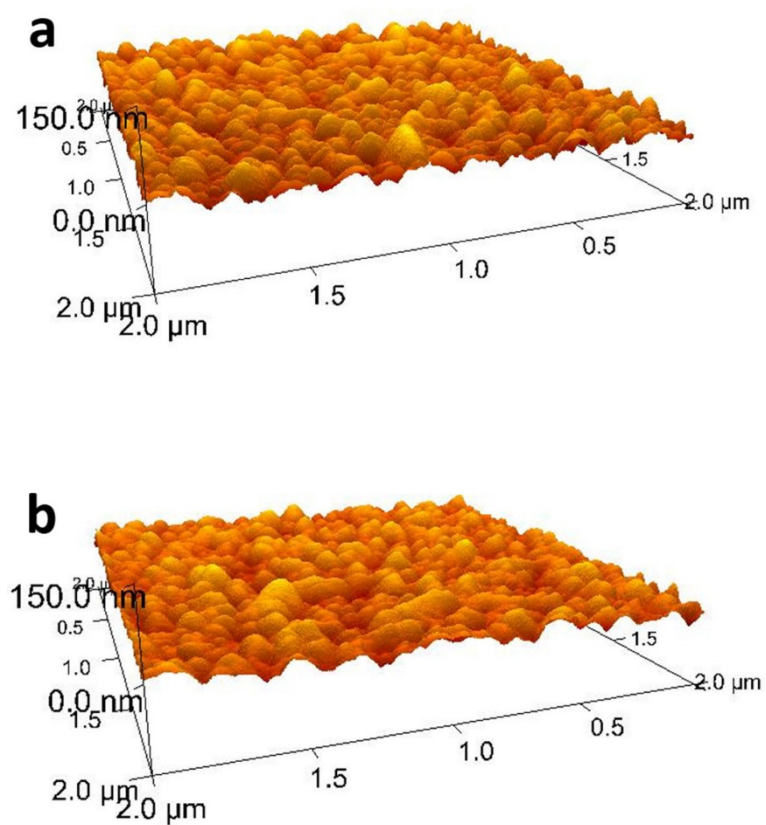

**Fig. S1.** AFM images of 3-dimensional patterns of the FTO substrates (a) without and (b) with a 7.5 nm  $C_{60}$  interface layer.

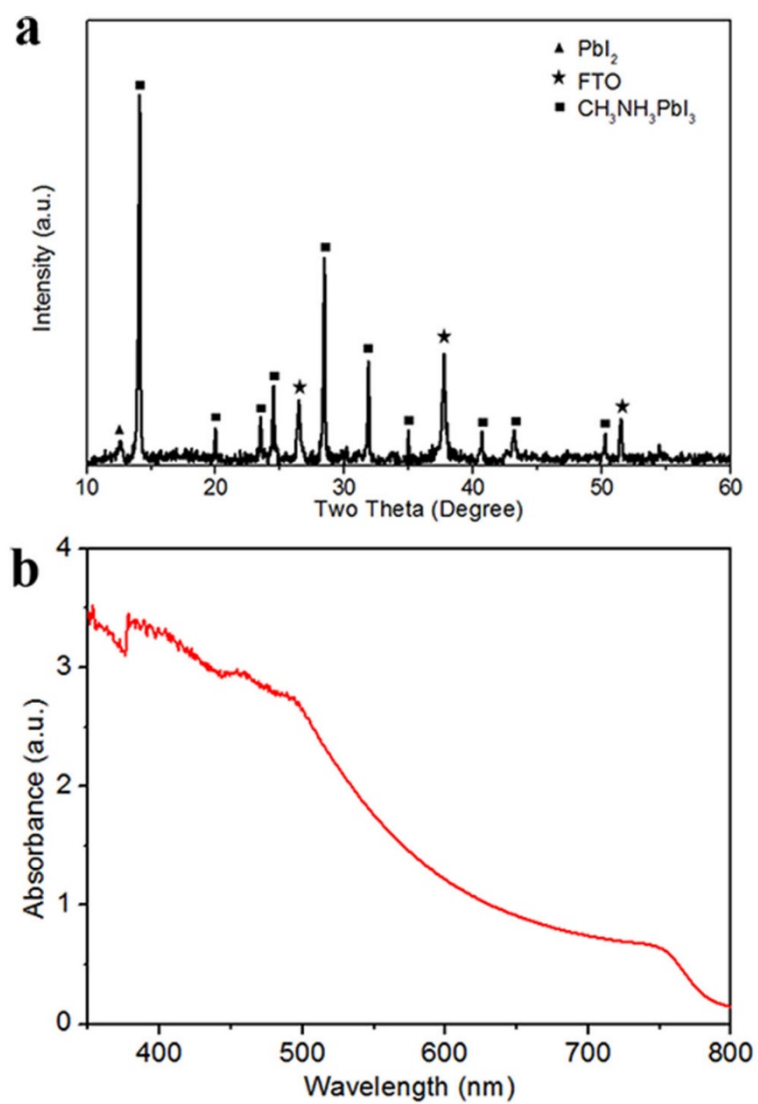

**Fig. S2.** (a) XRD pattern and (b) ultraviolet–visible absorbance spectrum of a perovskite film on an FTO substrate covered with a 7.5 nm  $\text{C}_{60}$  interface layer.

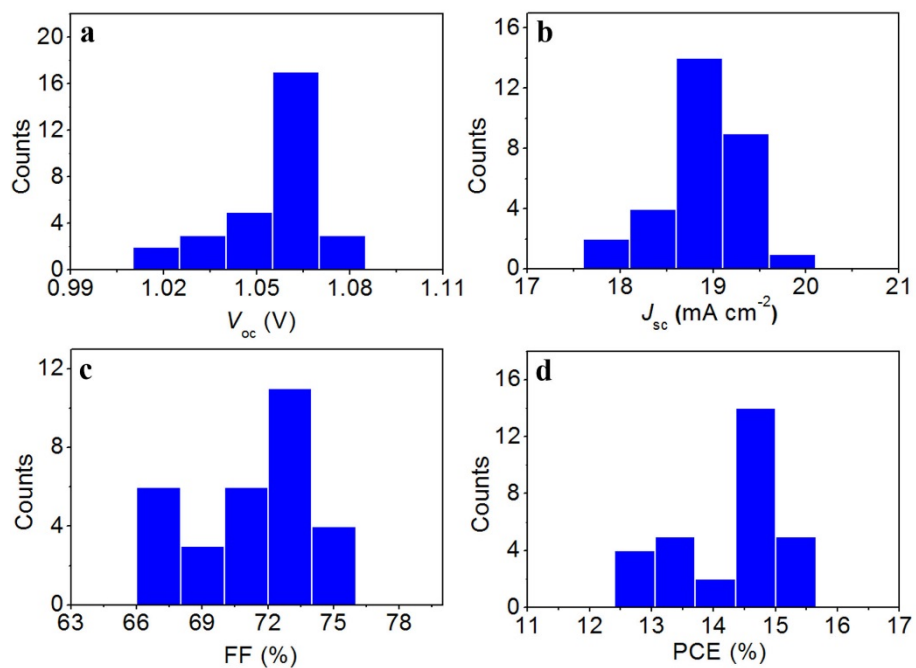

**Fig. S3.** Histograms of (a)  $V_{oc}$ 's, (b)  $J_{sc}$ 's, (c) FFs, and (d) PCEs for 30 cells using the vacuum-processed  $C_{60}$  electron selective layers measured under reverse voltage scanning.

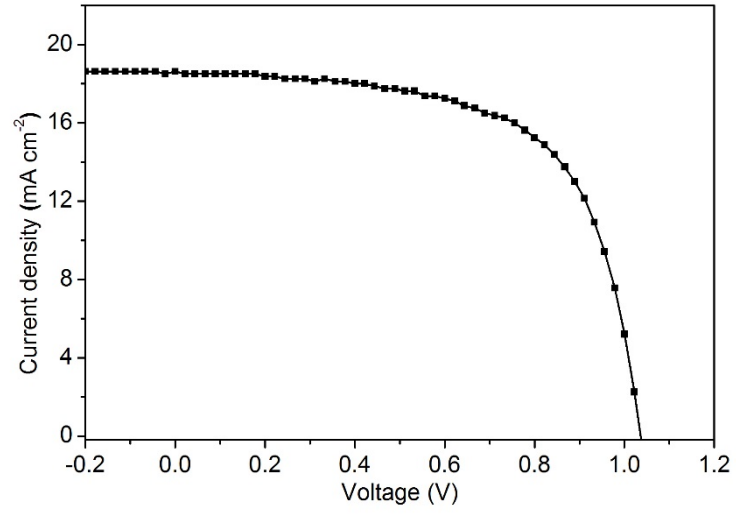

**Fig. S4.**  $J$ - $V$  curve of the best-performing perovskite solar cell using a solution-processed C<sub>60</sub> electron selective layer measured under reverse voltage scanning.

## References

1. K. Wojciechowski, T. Leijtens, S. Spirova, C. Schlueter, M. Hoerantner, J. T.-W. Wang, C.-Z. Li, A. K.-Y. Jen, T.-L. Lee and H. J. Snaith, *J. Phys. Chem. Lett.*, 2015, **6**, 2399–2405.
2. W. Ke, G. Fang, J. Wang, P. Qin, H. Tao, H. Lei, Q. Liu, X. Dai and X. Zhao, *ACS Appl. Mater. Interfaces*, 2014, **6**, 15959-15965.
